# Supplementary material for: Identification and Expression Profiles of Sex Pheromone Biosynthesis and Transport Related Genes in Spodoptera litura
Source: PLoS One. 2015 Oct 7;10(10):e0140019. doi: 10.1371/journal.pone.0140019 (PMC4596838; doi:10.1371/journal.pone.0140019)
Supplement: S2 Table — (XLS) [file pone.0140019.s004.xls]

## Sheet: Table S2
S2 Table Accession numbers for amino acid sequences of Dess, FARs, OBPs and CSPs used in phylogenetic analyses
Species	Gene name	Acc. number	Species	Gene name	Acc. number	Species	Gene name	Acc. number	Species	Gene name	Acc. number	Species	Gene name	Acc. number
Des			FAR			OBP			OBP			CSP
S. litura	SlitDes1	KT261685	S. litura	SlitFAR1	KT261695	S. litura	SlitOBP1	KT261647	S. inferens	SinfOBP8	KC887514	S. litura	SlitCSP1	KT261672
S. litura	SlitDes2	KT261686	S. litura	SlitFAR2	KT261696	S. litura	SlitOBP2	KT261648	S. inferens	SinfOBP9	KC887515	S. litura	SlitCSP2	KT261673
S. litura	SlitDes3	KT261687	S. litura	SlitFAR3	KT261697	S. litura	SlitOBP3	KT261649	S. inferens	SinfOBP10	KC887516	S. litura	SlitCSP3	KT261674
S. litura	SlitDes4	KT261688	S. litura	SlitFAR4	KT261698	S. litura	SlitOBP4	KT261650	S. inferens	SinfOBP12	KC887518	S. litura	SlitCSP4	KT261675
S. litura	SlitDes5	AGH12217.1	S. litura	SlitFAR5	KT261699	S. litura	SlitOBP5	KT261651	S. inferens	SinfOBP13	KC887519	S. litura	SlitCSP5	KT261676
S. litura	SlitDes6	KT261689	S. litura	SlitFAR6	KT261700	S. litura	SlitOBP6	KT261652	S. inferens	SinfOBP14	Zhang et al. 2013	S. litura	SlitCSP6	KT261677
S. litura	SlitDes7	KT261690	S. litura	SlitFAR7	KT261701	S. litura	SlitOBP7	KT261653	S. inferens	SinfOBP15	KC887521	S. litura	SlitCSP7	KT261678
S. litura	SlitDes8	KT261691	S. litura	SlitFAR8	KT261702	S. litura	SlitOBP8	KT261654	S. inferens	SinfOBP16	KC887522	S. litura	SlitCSP8	KT261679
S. litura	SlitDes9	AGH12218.1	S. litura	SlitFAR9	KT261703	S. litura	SlitOBP9	KT261655	S. inferens	SinfOBP17	KC887523	S. litura	SlitCSP9	KT261680
S. litura	SlitDes10	KT261692	S. litura	SlitFAR10	KT261704	S. litura	SlitOBP10	KT261656	S. inferens	SinfOBP18	Zhang et al. 2013	S. litura	SlitCSP10	KT261681
S. litura	SlitDes11	KT261693	S. litura	SlitFAR11	KT261705	S. litura	SlitOBP11	KT261657	S. inferens	SinfABPX	KC887520	S. litura	SlitCSP11	KT261682
S. litura	SlitDes12	KT261694	S. litura	SlitFAR12	KT261706	S. litura	SlitOBP12	KT261658	B. mori	BmorOBP1	Gong et al. 2009	S. litura	SlitCSP12	KT261683
S. inferens	SinfDes1	KF960738	S. litura	SlitFAR13	KT261707	S. litura	SlitOBP13	KT261659	B. mori	BmorOBP2	Gong et al. 2009	S. litura	SlitCSP13	KT261684
S. inferens	SinfDes2	KF960739	S. inferens	SinfFAR1	KF960747	S. litura	SlitOBP14	KT261660	B. mori	BmorOBP3	Gong et al. 2009	S. litura	SlitCSP14	AAY26143.1
S. inferens	SinfDes3	KF960740	S. inferens	SinfFAR2	KF960748	S. litura	SlitOBP15	KT261661	B. mori	BmorOBP4	Gong et al. 2009	M. sexta	MsexCSP1	Grosse-Wilde et al. 2011
S. inferens	SinfDes4	KF960741	S. inferens	SinfFAR3	KF960749	S. litura	SlitOBP16	KT261662	B. mori	BmorOBP5	Gong et al. 2009	M. sexta	MsexCSP3	Grosse-Wilde et al. 2011
S. inferens	SinfDes5	KF960742	H. armigera	HarmFAR	AFD04728	S. litura	SlitOBP17	KT261663	B. mori	BmorOBP6	Gong et al. 2009	M. sexta	MsexCSP4	Grosse-Wilde et al. 2011
S. inferens	SinfDes6	KF960743	H. virescens	HvirFAR	ACX53790	S. litura	SlitOBP18	KT261664	B. mori	BmorOBP7	Gong et al. 2009	M. sexta	MsexCSP5	Grosse-Wilde et al. 2011
O. nubilalis	OnubZ/E14	AAL35330	H. assulta	HassFAR	AFD04727	S. litura	SlitOBP19	KT261665	B. mori	BmorOBP8	Gong et al. 2009	M. sexta	MsexCSP10	Grosse-Wilde et al. 2011
O. nubilalis	OfurZ/E14	AAL35330	H. subflexa	HsubFAR	AFD04726	S. litura	SlitOBP20	KT261666	B. mori	BmorOBP9	Gong et al. 2009	M. sexta	MsexCSP11	Grosse-Wilde et al. 2011
O. scapulalis	OscaFAD14	BAE97679	B. mori	BmorFAR	BAC79426	S. litura	SlitOBP21	KT261667	B. mori	BmorOBP10	Gong et al. 2009	M. sexta	MsexCSP13	Grosse-Wilde et al. 2011
C. parallela	CparZ9	AAQ12887	Y. evonymellus	YevoFARII	ADD62439	S. litura	SlitOBP22	KT261668	B. mori	BmorOBP11	Gong et al. 2009	M. sexta	MsexCSP14	Grosse-Wilde et al. 2011
H. assulta	HassGATD	AAM28480	Y. padellus	YpadFARII	ADD62442	S. litura	SlitOBP23	KT261669	B. mori	BmorOBP12	Gong et al. 2009	M. sexta	MsexSAP1	Grosse-Wilde et al. 2011
L. capitella	LcapNF	ABX71629	Y. rorrellus	YrorFARII	ADD62441	S. litura	SlitOBP24	KT261670	B. mori	BmorOBP13	Gong et al. 2009	M. sexta	MsexCSP6	Grosse-Wilde et al. 2011
L. capitella	LcapZ9	ABX71627	O. nubilalis	OnubZpgFAR	ACY07547	S. litura	SlitOBP25	AIS72934.1	B. mori	BmorOBP14	Gong et al. 2009	M. sexta	MsexSAP2	Grosse-Wilde et al. 2011
S. littoralis	SlitZ9	AAQ74258	O. scapulalis	OscaFARXIII	ACJ06520	M. sexta	MsexABP2	Grosse-Wilde et al. 2011	B. mori	BmorOBP15	Gong et al. 2009	M. sexta	MsexSAP3	Grosse-Wilde et al. 2011
H. assulta	HassZ9	AAM28481	O. nubilalis	OnubEpgFAR	ACY07546	M. sexta	MsexABP3	Grosse-Wilde et al. 2011	B. mori	BmorOBP16	Gong et al. 2009	M. sexta	MsexSAP4	Grosse-Wilde et al. 2011
A. selenaria cretacea	Asel	BAF97042	D. pulex	Dpul	EFX77189	M. sexta	MsexABP4	Grosse-Wilde et al. 2011	B. mori	BmorOBP17	Gong et al. 2009	M. sexta	MsexSAP5	Grosse-Wilde et al. 2011
P. octo	PoctZ9	AAF73073	O. nubilalis	OnubFAR1	ADI82774	M. sexta	MsexABP5	Grosse-Wilde et al. 2011	B. mori	BmorOBP18	Gong et al. 2009	S. littoralis	SlitFQ024845	Legeai et al. 2011
A. velutinana	AvelZ9	AAF44709	D. melanogaster	DmelFARCG8306	Q960W6	M. sexta	MsexABP6	Grosse-Wilde et al. 2011	B. mori	BmorOBP19	Gong et al. 2009	S. littoralis	SlitEZ981604	Legeai et al. 2011
E. postvittana	EposZ9	AAL35750	D. mojavensis	DmojGI21145	XP_002006594	M. sexta	MsexABP7	Grosse-Wilde et al. 2011	B. mori	BmorOBP20	Gong et al. 2009	S. littoralis	SlitEZ983373	Legeai et al. 2011
C. rosaceana	CrosZ9	AAN39697	A. aegypti	Aaeg	XP_001652667	M. sexta	MsexABP8	Grosse-Wilde et al. 2011	B. mori	BmorOBP21	Gong et al. 2009	S. littoralis	SlitEZ982930	Legeai et al. 2011
O. nubilalis	OnubZ9	AAF44710	D. virilis	DvirGJ20993	XP_002049019	M. sexta	MsexOBP	Grosse-Wilde et al. 2011	B. mori	BmorOBP22	Gong et al. 2009	S. littoralis	SlitEZ982103	Legeai et al. 2011
D. punctatus	DpunZ/E9	ABX71810	D. grimshawi	DgriGH23076	XP_001995294	M. sexta	MsexOBP2	Grosse-Wilde et al. 2011	B. mori	BmorOBP23	Gong et al. 2009	S. littoralis	SlitEZ982609	Legeai et al. 2011
M. sexta	MsexZ9	CAJ27975	D. willistoni	DwilGK10652	XP_002061051	M. sexta	MsexOBP3	Grosse-Wilde et al. 2011	B. mori	BmorOBP25	Gong et al. 2009	S. littoralis	SlitEZ983355	Legeai et al. 2011
B. mori	Bmor	NP_001036971	D. persimilis	DperGL11789	XP_002026628	M. sexta	MsexOBP4	Grosse-Wilde et al. 2011	B. mori	BmorOBP26	Gong et al. 2009	S. littoralis	SlitGW825956	Legeai et al. 2011
H. zea	HzeaZ9	AAF81788	D. pseudoobscura	DpseGA18633	XP_001362049	M. sexta	MsexOBP5	Grosse-Wilde et al. 2011	B. mori	BmorOBP27	Gong et al. 2009	S. littoralis	SlitHO118383	Legeai et al. 2011
T. ni	TniZ9	AAB92583	D. ananassae	DanaGF11398	XP_001960644	M. sexta	MsexOBP6	Grosse-Wilde et al. 2011	B. mori	BmorOBP28	Gong et al. 2009	S. inferens	SinfCSP6	KC907742
S. littoralis	SlitZ9-2	AAQ74257	D. erecta	DereGG20619	XP_001975330	M. sexta	MsexOBP7	Grosse-Wilde et al. 2011	B. mori	BmorOBP29	Gong et al. 2009	S. inferens	SinfCSP12	KC907748
H. assulta	HassZ9-2	AAM28484	D. yakuba	DyakGE11808	XP_002092183	M. sexta	MsexGOBP1	Grosse-Wilde et al. 2011	B. mori	BmorOBP30	Gong et al. 2009	S. inferens	SinfCSP13	KC907749
D. punctatus	Dpun	ABX71813	D. sechellia	DsecGM21714	XP_002034156	M. sexta	MsexGOBP2	Grosse-Wilde et al. 2011	B. mori	BmorOBP31	Gong et al. 2009	S. inferens	SinfCSP14	KC907750
O. furnacalis	OfurZ9	AAL27034	O. scapulalis	OscaFARVII	ACJ06514	M. sexta	MsexPBP1	Grosse-Wilde et al. 2011	B. mori	BmorOBP32	Gong et al. 2009	S. inferens	SinfCSP15	KC907751
O. furnacalis	OnubZ9-2	AAL27034	H. saltator	HsalFAR1-1	EFN87624	M. sexta	MsexPBP2	Grosse-Wilde et al. 2011	B. mori	BmorOBP33	Gong et al. 2009	S. inferens	SinfCSP16	KC907752
B. mori	Bmor-2	NP_001037018	H. saltator	HsalFAR1-2	EFN84876	M. sexta	MsexPBP3	Grosse-Wilde et al. 2011	B. mori	BmorOBP34	Gong et al. 2009	S. inferens	SinfCSP17	KC907753
E. postvittana	EposZ9-2	AAK94070	H. saltator	HsalFAR1-3	EFN87623	S. littoralis	SlitFQ017058	Legeai et al. 2011	B. mori	BmorOBP35	Gong et al. 2009	S. inferens	SinfCSP18	KC907754
E. postvittana	EposE11	AAL11496	O. scapulalis	OscaFARXII	ACJ06519	S. littoralis	SlitFQ031480	Legeai et al. 2012	B. mori	BmorOBP36	Gong et al. 2009	S. inferens	SinfCSP19	KC907755
A. velutinana	AvelZ/E11	AAL16642	C. floridanus	CfloFAR1-1	EFN66140	S. littoralis	SlitFQ019778	Legeai et al. 2013	B. mori	BmorOBP37	Gong et al. 2009	S. inferens	SinfCSP20	KC907756
C. parallela	CparE11	AAQ12891	C. floridanus	CfloFAR1-2	EFN66142	S. littoralis	SlitFQ021259	Legeai et al. 2014	B. mori	BmorOBP38	Gong et al. 2009	S. inferens	SinfCSP21	KC907757
D. punctatus	DpunZ/E11	ABX71809	O. scapulalis	OscaFARIX	ACJ06516	S. littoralis	SlitFQ021918	Legeai et al. 2015	B. mori	BmorOBP39	Gong et al. 2009	S. inferens	SinfCSP23	KC907759
T. ni	TniZ11	AF035375	O. scapulalis	OscaFARI	ACJ06516	S. littoralis	SlitEZ983259	Legeai et al. 2016	B. mori	BmorOBP40	Gong et al. 2009	S. inferens	SinfCSP24	KC907760
M. brassicae	MbraZ11	ABX90049	C. quinquefasciatus	CquiFAR1-1	EDS27090	S. littoralis	SlitGW825701	Legeai et al. 2017	B. mori	BmorOBP41	Gong et al. 2009	B. mori	BmorCSP1	FJ425876.1
H. assulta	HassZ11	AF482908	C. quinquefasciatu	CquiFAR1-2	EDS29031	S. littoralis	SlitFQ021292	Legeai et al. 2018	B. mori	BmorOBP42	Gong et al. 2009	B. mori	BmorCSP2	NP_001091778
S. littoralis	SlitZ11/E11	AAQ74259	C. quinquefasciatu	CquiFAR1-3	EDS35447	S. littoralis	SlitEZ982114	Legeai et al. 2019	B. mori	BmorOBP43	Gong et al. 2009	B. mori	BmorCSP3	NM_001043598.2
T. pityocampa	TpitZ11/11-13	ABO43722	O. nubilalis	OnubFAR5	ADI82778	S. littoralis	SlitEZ982027	Legeai et al. 2020	B. mori	BmorOBP44	Gong et al. 2009	B. mori	BmorCSP5	NM_001043597.1
O. scapulalis	Osca	BAE66602	Y. evonymellus	YevoFARI	ADD62438	S. littoralis	SlitFQ020630	Legeai et al. 2021				B. mori	BmorCSP6	NM_001043935.2
O. furnacalis	OfurZ/E11	AAL32060	A. pisum	ApisFARCG5065	XP_001950244	S. littoralis	SlitFQ021928	Legeai et al. 2022				B. mori	BmorCSP7	NM_001043603.1
O. nubilalis	OnubZ/E11	AAL35331	O. nubilalis	OnubFAR2	ADI82775	S. littoralis	SlitFQ014244	Legeai et al. 2023				B. mori	BmorCSP8	NM_001043602.1
C. rosaceana	CrosNF	AAN39698	O. scapulalis	OscaFARVI	ACJ06513	S. littoralis	SlitFQ018693	Legeai et al. 2024				B. mori	BmorCSP9	NP_001037069.1
Y. padellus	YpadZ/E11	ADP21588	O. scapulalis	OscaFARIV	ACJ06511	S. littoralis	SlitEZ982153	Legeai et al. 2025				B. mori	BmorCSP11	NM_001098309.1
B. mori	Bmor-3	NP_001036914	O. scapulalis	OscaFARV	ACJ06512	S. inferens	SinfPBP1	JF927621.1				B. mori	BmorCSP12	NM_001098310.1
M. sexta	MsexZ11/10-12	CAJ27976	O. nubilalis	OnubFAR4	ADI82777	S. inferens	SinfPBP2	JN984058.1				B. mori	BmorCSP13	NM_001043715.1
B. mori	BmorZ11/10-12	AAG16901	O. scapulalis	OscaFARVIII	ACJ06515	S. inferens	SinfPBP3	JF927622.1				B. mori	BmorCSP14	NM_001043727.2
A. pernyi	AperZ11	ADO85596	Y. evonymellus	YevoFARIII	ADD62440	S. inferens	SinfGOBP1	KC887506				B. mori	BmorCSP15	NM_001098311.1
P. octo	PoctZ10	AAG54077	O. nubilalis	OnubFAR6	ADI82779	S. inferens	SinfGOBP2	Zhang et al. 2013				B. mori	BmorCSP16	NM_001098312.1
O. brumata	Obru-TerDesat	AEH95845	O. scapulalis	OscaFARII	ACJ06509	S. inferens	SinfOBP1	KC887507
D. punctatus	DpunZ/E11-Z/E8	ABX71808	O. scapulalis	OscaFARIII	ACJ06510	S. inferens	SinfOBP2	KC887508
B. mori	Bmor-4	NP_001040141	A. mellifera	AmelFAR1	NP_001180219	S. inferens	SinfOBP3	KC887509
M. sexta	Msex	CAJ43430	N. vitripennis	NvitFARCG5065	XP_001601849	S. inferens	SinfOBP4	KC887510
H. zea	HzeaZ11	AAF81787	S. invicta	Sinv12809	EFZ13704	S. inferens	SinfOBP5	KC887511
C. rosaceana	CrosZ/E11	AAN41250				S. inferens	SinfOBP6	KC887512
C. parallela	CparNF	AAN39693				S. inferens	SinfOBP7	KC887513
